# Supplementary material for: Active retrotransposons help maintain pericentromeric heterochromatin required for faithful cell division
Source: HighWire-hosted journal article supplement (doi:10.1101/gr.256131.119), 2020-10-15
Supplement: Supplemental_Files.pdf [file Supplemental_Files.pdf]

## Supplemental\_Fig\_S1

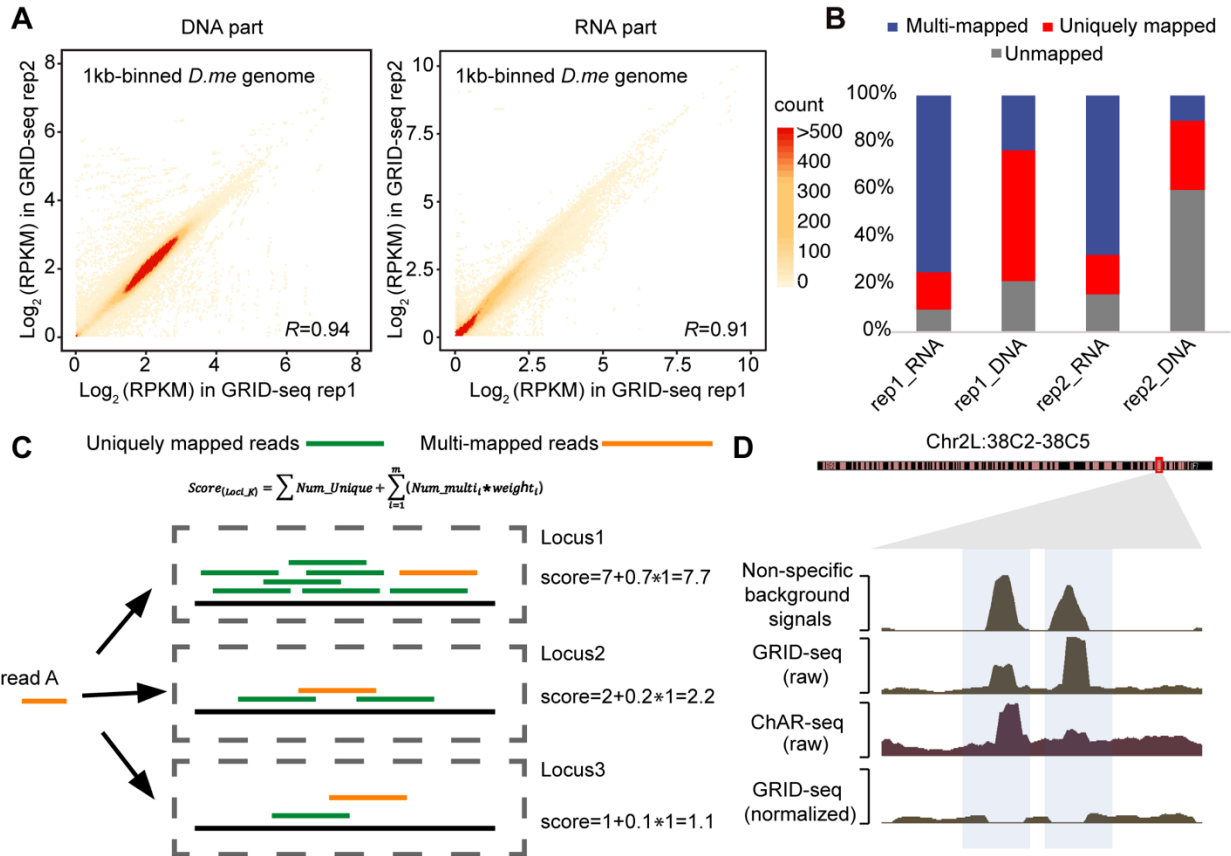

### Supplemental Fig S1. Strategy for assigning multi-mapped RNA and DNA reads

(A) Correlation between DNA (left) or RNA (right) levels in 1 kb-binned *Drosophila* genome between the two independent GRID-seq libraries. RPKM: Reads *per kilobase per million*. (B) Proportions of uniquely mapped, multi-mapped and unmapped RNA or DNA reads identified in the two independent GRID-seq libraries. (C) The ShortStack strategy for assigning multi-mapped reads proportionally to uniquely mapped reads in individual bins. (D) A typical genomic region displaying non-specific RNA binding signals on DNA based on human RNA mapped to the fly genome, raw GRID-seq or ChAR-seq RNA-DNA interaction signals, and background-corrected GRID-seq signals.

## Supplemental\_Fig\_S2

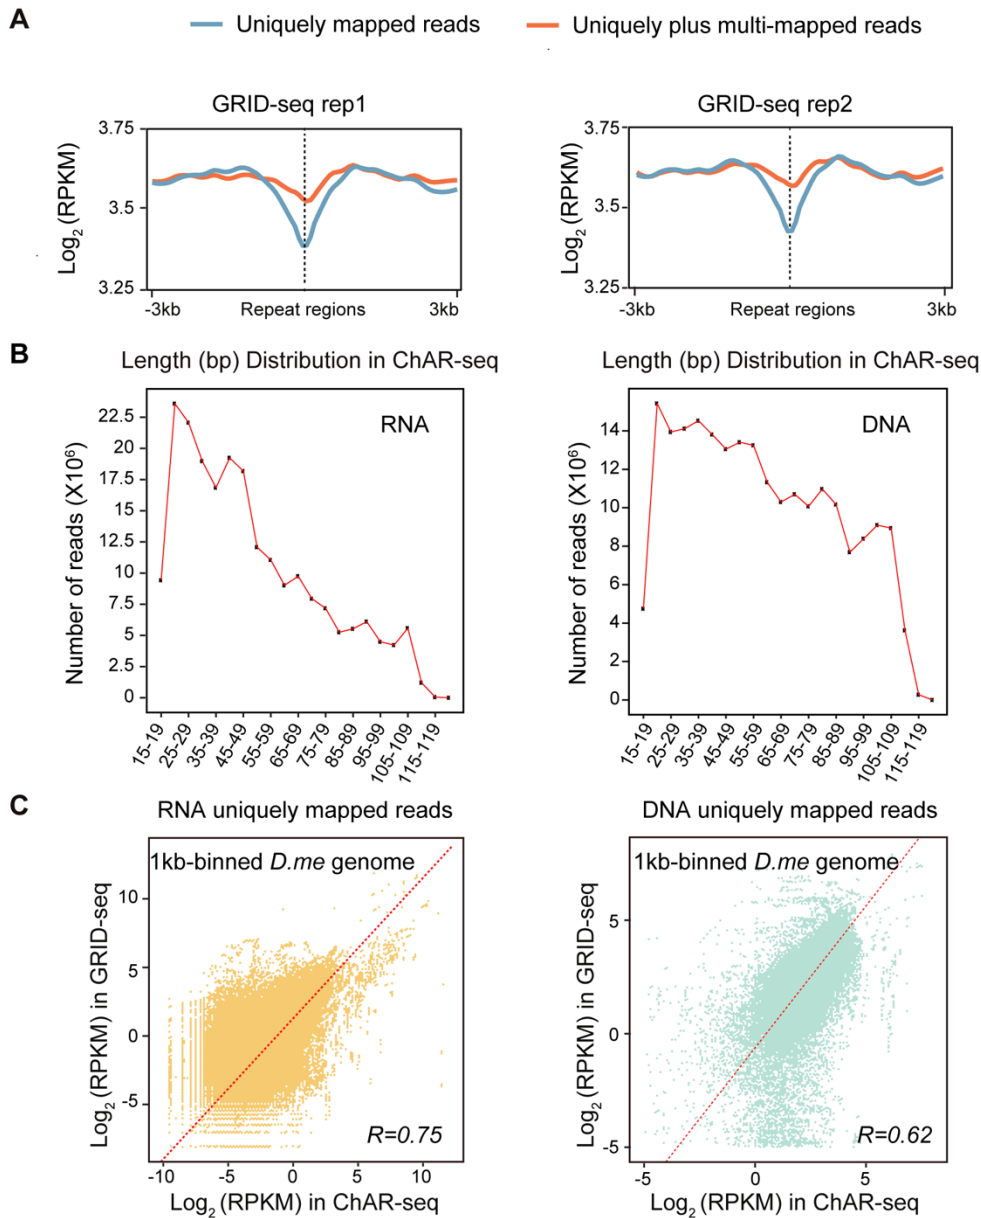

### Supplemental Fig S2. Strategy for assigning multi-mapped RNA and DNA reads

(A) Distribution of RNA interaction signals on the center of repeat-rich DNA regions before and after assigning RNA-DNA interaction reads that contain multi-mapped RNAs. RPKM: Reads *per* kilobase *per* million. (B) The length distribution of RNA (left panel) and DNA (right panel) from the combined ChAR-seq dataset. (C) Comparison between GRID-seq and ChAR-seq libraries using uniquely mapped RNA (left panel) or DNA (right panel) reads in 1kb-binned *Drosophila* genome.

## Supplemental\_Fig\_S3

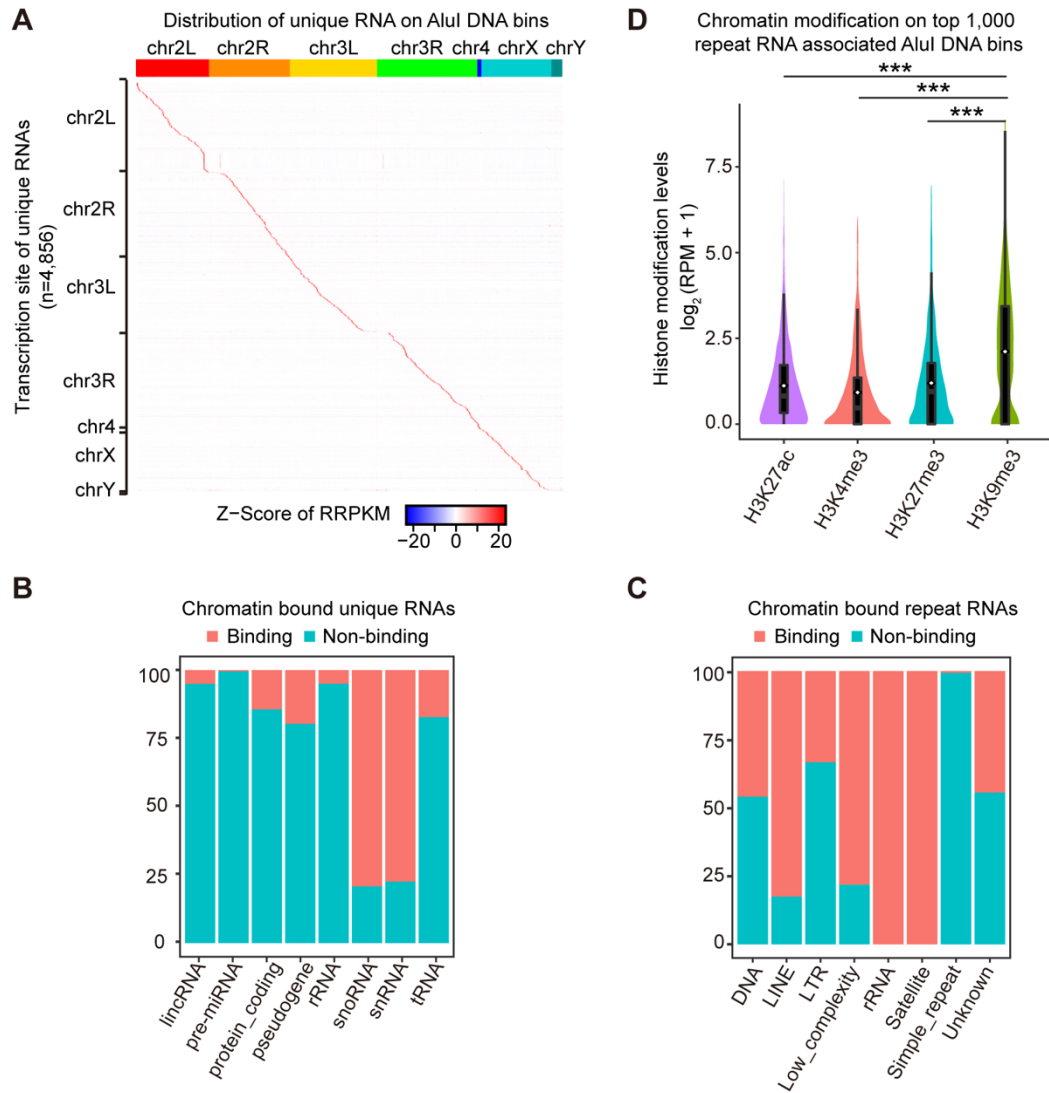

### Supplemental Fig S3. Interaction of different RNA classes with DNA

(A) Heatmap of 4,856 annotated unique RNAs on AluI-generated DNA bins across the *Drosophila* genome in S2 cells. (B) Different unique RNA classes and the percentage of different RNA species in each class involved in interactions with DNA. (C) Different repeat RNA classes and the percentage of different RNA species in each class involved in interactions with DNA. (D) Chromatin modification signals of top 1,000 repeat-derived RNAs on AluI DNA bins. \*p<0.05 \*\*p<0.01 \*\*\* p<0.001 (Wilcoxon rank sum test).

## Supplemental\_Fig\_S4

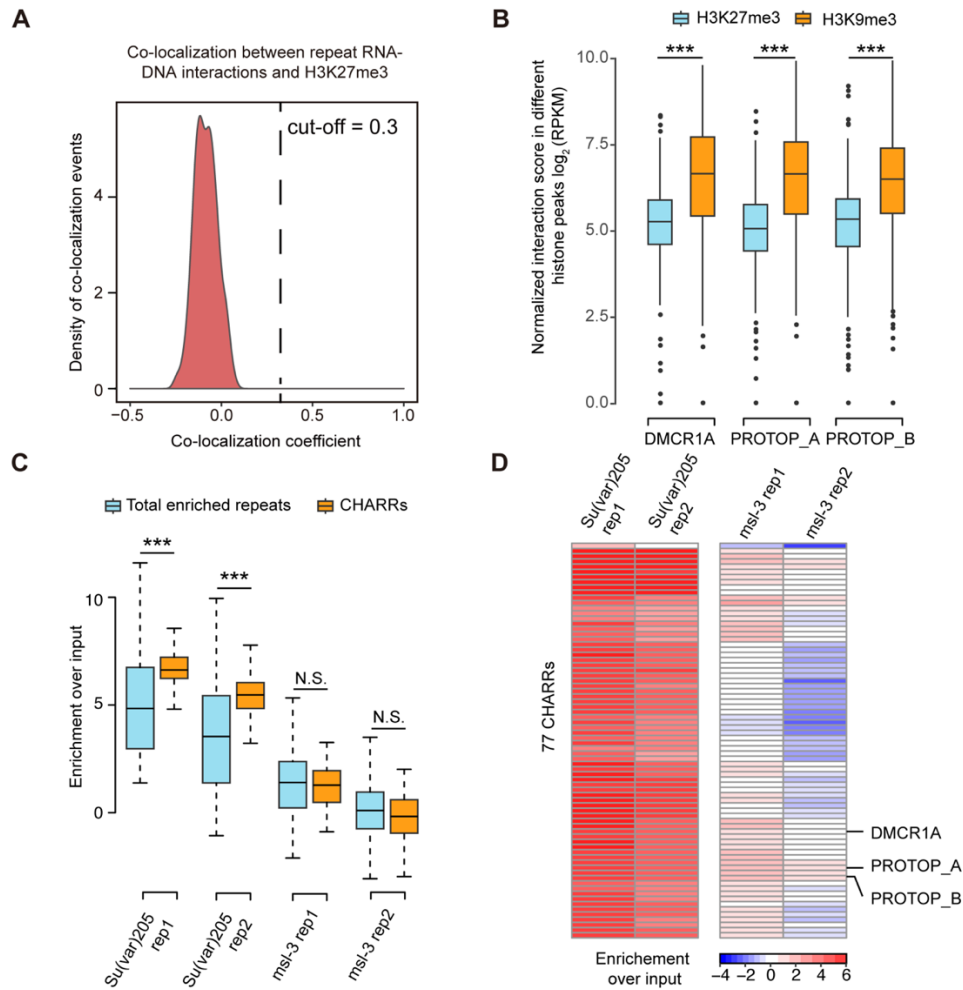

### Supplemental Fig S4. Preferential association of *gypsy*-derived RNAs with constitutive heterochromatin

(A) Distribution of co-localization coefficients between repeat RNA interactions with DNA and the levels of H3K27me3. All co-localization events fall below the set threshold of 0.3 for H3K9me3 and Su(var)205 (see Fig. 3A). (B) The interaction scores of 3 specific CHARRs as indicated on H3K27me3 peaks (blue box) relative to H3K9me3 peaks (orange box). \*\*\* $p < 0.001$  (unpaired Student's *t*-test). (C) The distribution of log<sub>2</sub> enrichment scores for total repeat-derived RNAs in comparison with CHARRs (obtained from published paper) from published pulldown experiment with Su(var)205-BioTAP or msl-3-BioTAP complexes in S2 cells. \*\*\* $p < 0.001$  (unpaired Student's *t*-test). N.S.: not significant. (D) Heatmap showing log<sub>2</sub> enrichment score of CHARRs in Su(var)205-BioTAP or msl-3-BioTAP pulldown and RNA-seq analysis. Rows: individual CHARRs. Three representative CHARRs illustrated in Fig. 3C are labeled on the right.

# Supplemental\_Fig\_S5

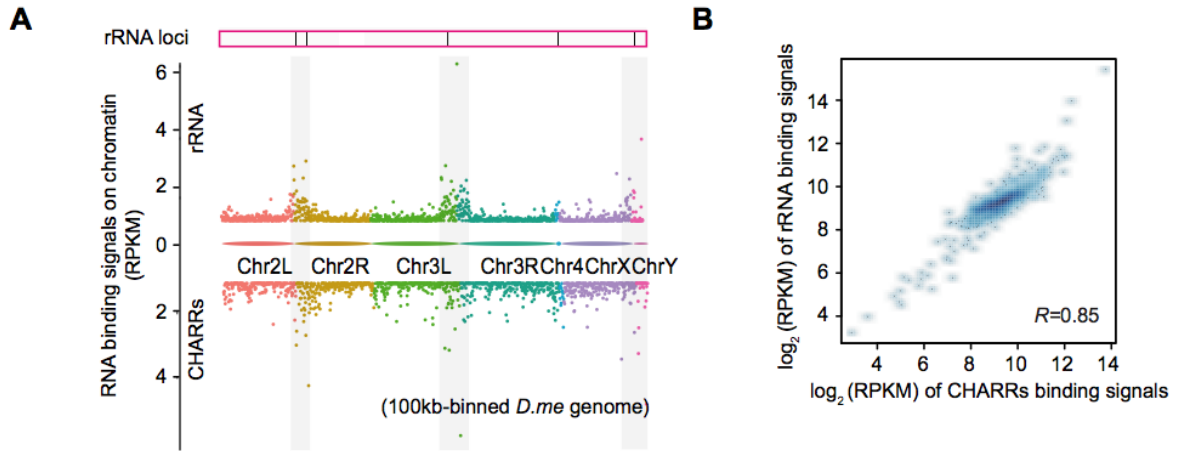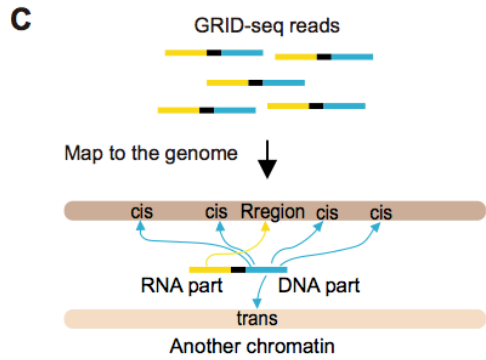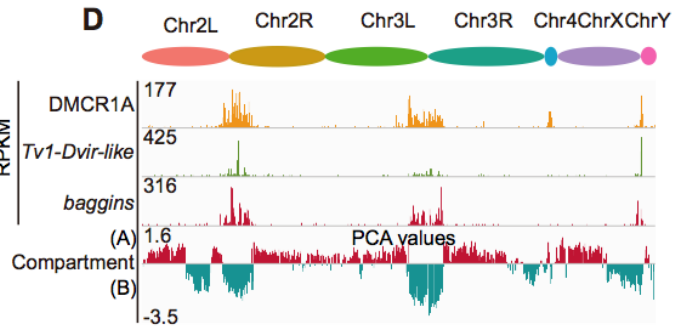

*gypsy* element : *gypsy4\_l-int*

cis reads example

TGTACTTACCGATTTTGTCA--linker--TTCGGGTGGACGATGAGGAG

ACATGAATGGCTAAAAACAGT AAGCCACCTGCTACTCCTC

Chr2L:21545817-21545837(-) Chr2R:5238402-5238421(-)

trans reads example

TGTACTTACCGATTTTGTCA--linker--ATGCTAACACATGTGCAAAAG

ACATGAATGGCTAAAAACAGT TACGATTGTGTACACGTTTC

Chr2L:21545817-21545837(-) ChrX:16415244-16415263(+)

Region: RNA transcribed region    RNA part    Linker

cis : RNA cis interacted regions    DNA part

trans: RNA trans interacted regions

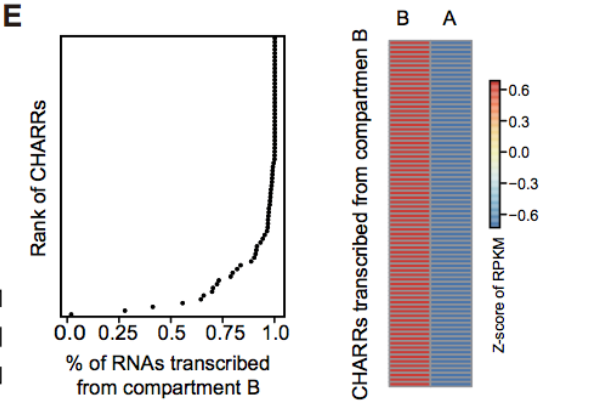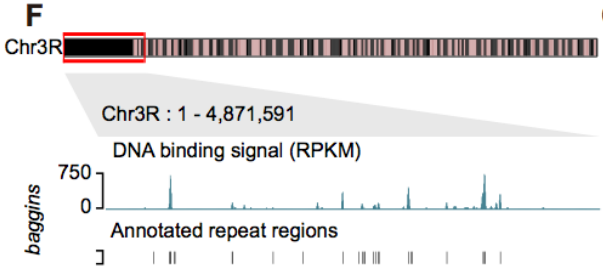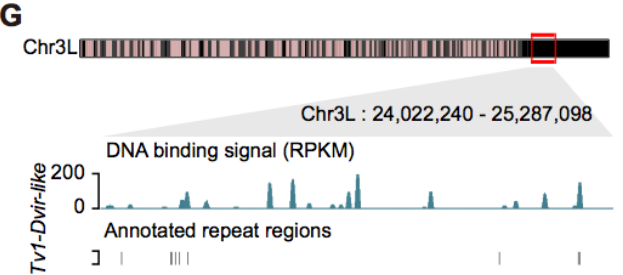

## Supplemental Fig S5. Interactions of rRNAs and CHARRs with DNA

(A) Top: Bars indicate the active rRNA transcription loci in the *Drosophila* genome. DNA binding signals for rRNA and CHARRs in 100 kb windows. Different colors indicate different chromosomes. Grey regions highlight elevated rRNA-DNA interaction regions, which are also associated with enriched binding signals for CHARRs. RPKM: Reads *per* kilobase *per* million. (B) The expression of CHARR binding (*x*-axis) and rRNA (*y*-axis) signals on individual DNA bins. The Spearman correlation coefficient (*R*) is indicated. RPM: Reads *per* million. (C) Overview on definition of *cis* versus *trans* interactions for individual CHARRs. (D) The interaction score of DMCR1A, *Tvl-Dvir-like*, and *baggins* on Hi-C defined compartment A or B based on positive or negative principal component analysis (PCA) values. RPKM: Reads *per* kilobase *per* million. (E) Rank of CHARRs according to their percentages of RNA transcribed from compartment B (Left panel). Heatmap of normalized interactions scores of compartment B-derived CHARRs in interactions compartment A or B regions (Right panel). (F) *baggins* RNA mostly interacts with DNA with the same repeat sequences, as indicated at bottom track. (G) *Tvl-Dvir-like* RNA interacts with a DNA region mostly lacking the same repeat sequence, as indicated at bottom track.

## Supplemental\_Fig\_S6

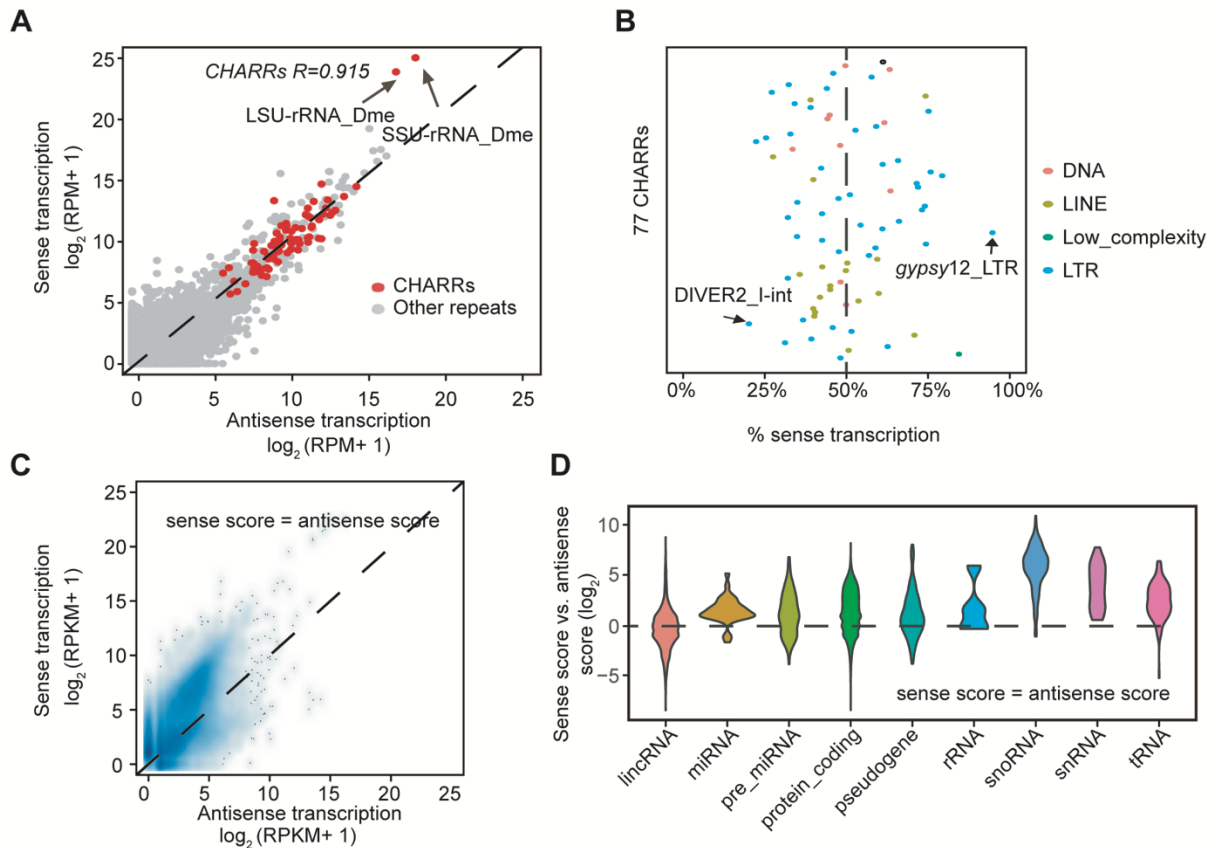

## Supplemental Fig S6. Convergent transcription of repeat RNAs

(A) Scatterplot of sense versus anti-sense transcription of repeat-derived RNAs based on the GRO-seq data from S2 cells. Identified CHARRs are highlighted in red. Arrows point to the two major rRNA transcripts. (B) Percentage of sense transcription-derived RNA for individual CHARRs in S2 cells. Different colors indicate different repeat classes CHARRs are derived from. Two represented CHARRs, DIVER2-I-int and *gypsy12\_LTR*, are highlighted. (C) Sense and antisense transcription of annotated unique RNAs. (D) Violin plots showing relative levels of sense and antisense transcription of different classes of non-repeat RNAs.

## Supplemental\_Fig\_S7

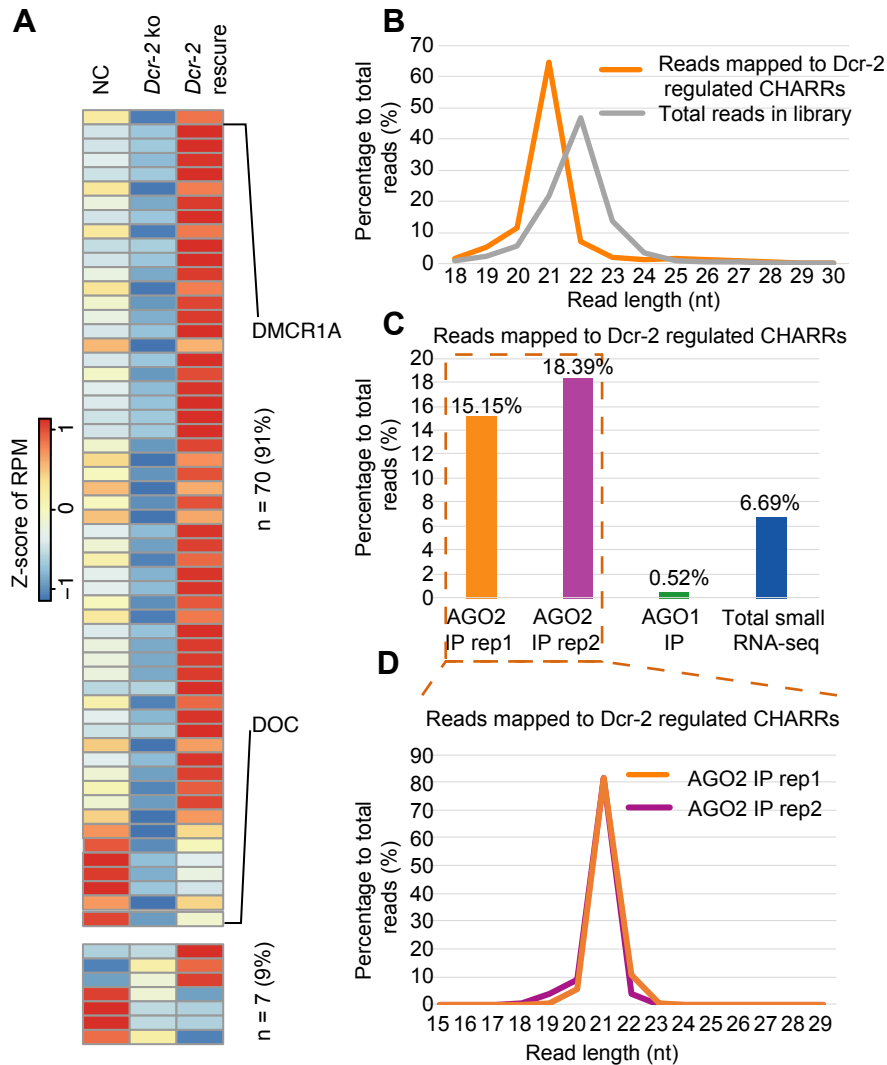

### Supplemental Fig S7. A group of CHARRs show siRNA properties

(A) Heatmap illustrating the expression of CHARRs in response to *Dcr-2* knockout and rescue. Labeled on the left are two representative CHARRs DMCR1A and DOC. ko: knockout. (B) The length distribution of reads mapped to *Dcr-2* regulated CHARRs based on the published small RNA-seq dataset in wild-type female fly heads. (C) The percentage of reads mapped to *Dcr-2* regulated CHARRs over total mapped reads in different small RNA-seq library in S2 cells. (D) The length distribution of reads mapped to *Dcr-2* regulated CHARRs in two different AGO2 IP small RNA-seq libraries.



## Supplemental\_Fig\_S8

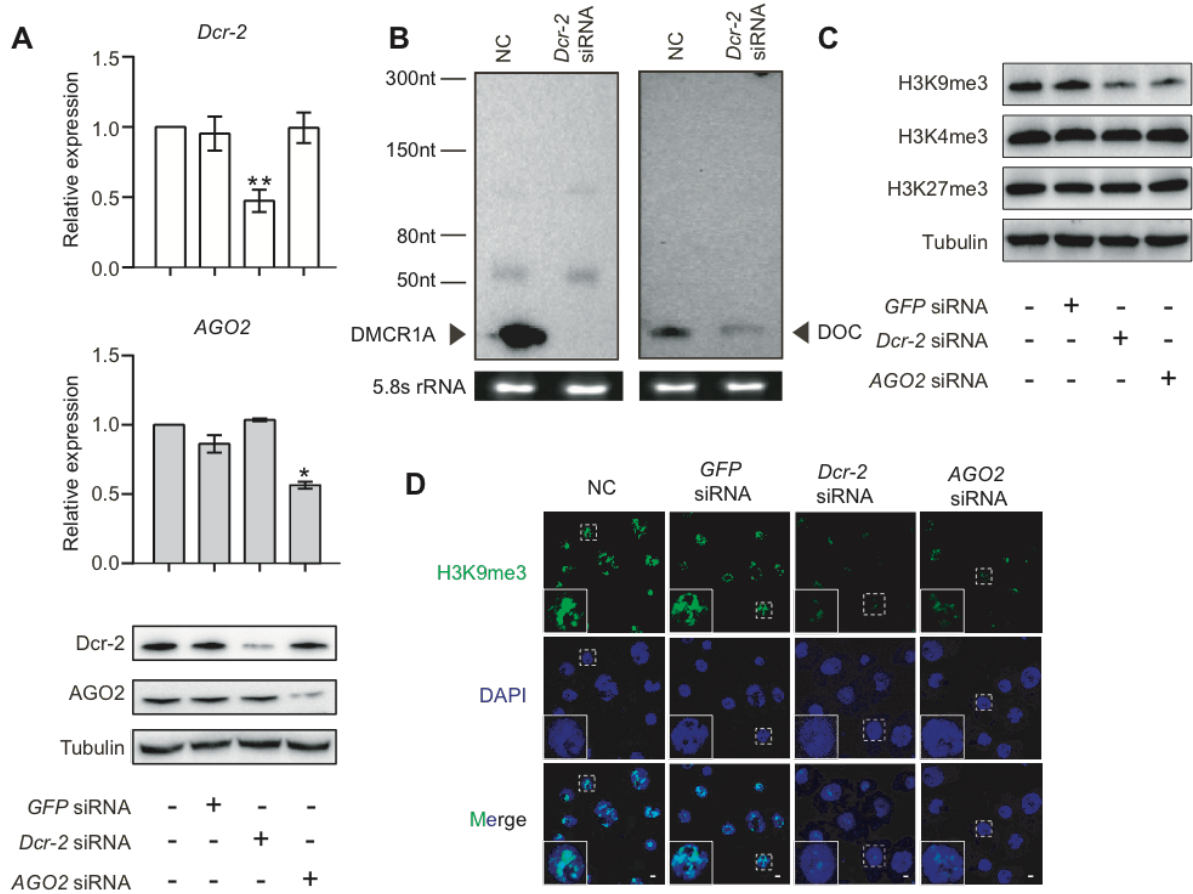

### Supplemental Fig S8. *Dcr-2* mediated processing of repeat RNAs

(A) Confirmation of *Dcr-2* and *AGO2* knockdown in S2 by RT-qPCR and Western blotting analysis. \*\* $p < 0.01$ , \* $p < 0.05$  from 3 technical repeats (unpaired Student's *t*-test). (B) Confirmation of *Dcr-2* dependent expression of DMCR1A (left) and DOC (right) expression by Northern blotting analysis. (C and D) The level of H3K9me3, H3K27me3, H3K4me3 and Tubulin in S2 cells in response to siRNA-mediated knockdown of *Dcr-2* and *AGO2* detected by Western blotting analysis (C) and immunocytochemistry (D), Green, H3K9me3 signals; blue, DAPI. Scale bar, 2 $\mu$ m.

## Supplemental\_Fig\_S9

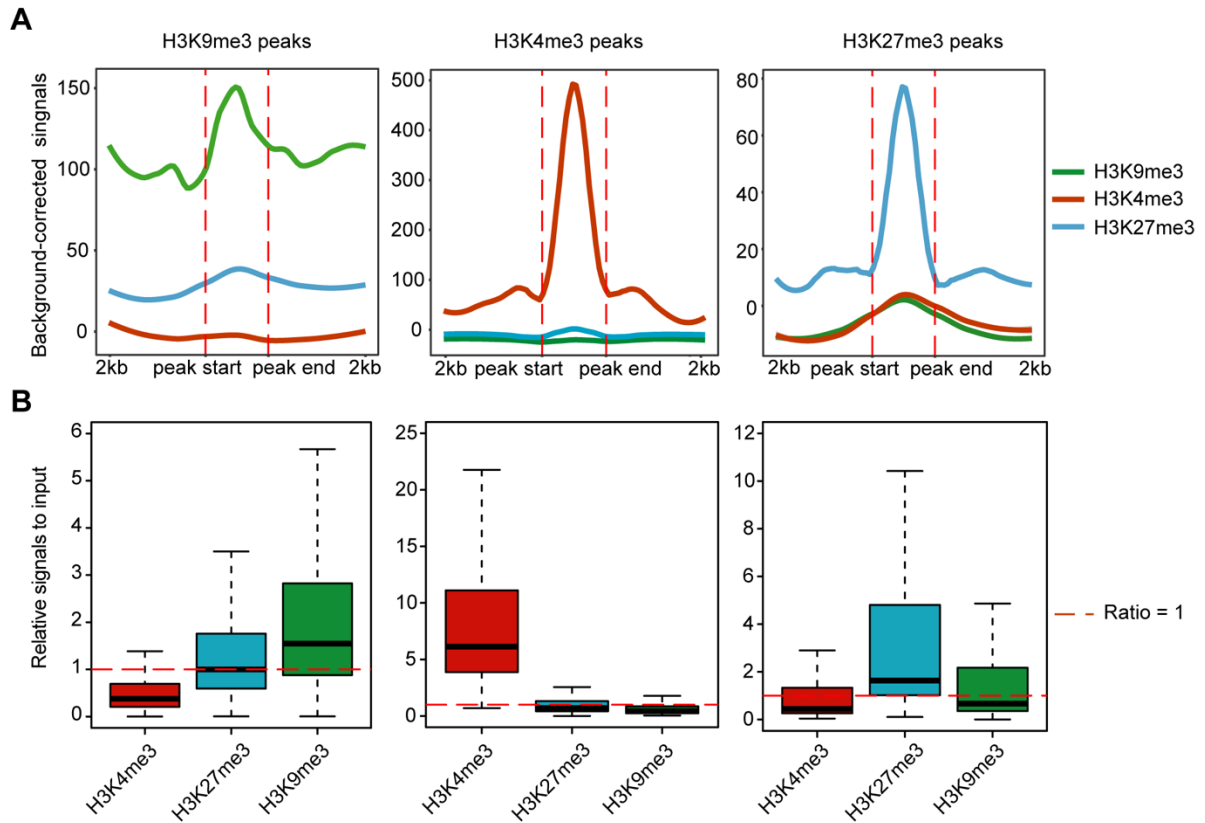

**Supplemental Fig S9. Comparison of the ChIP-seq profiles generated in this study with public data sets**

(A) Distribution of indicated histone modification signals around corresponding peaks deduced from the public datasets. (B) Boxplots showing fold changes of histone modification signals on corresponding peaks deduced from the public datasets. Red dash: background ChIP-seq signals.

## Supplemental\_Fig\_S10

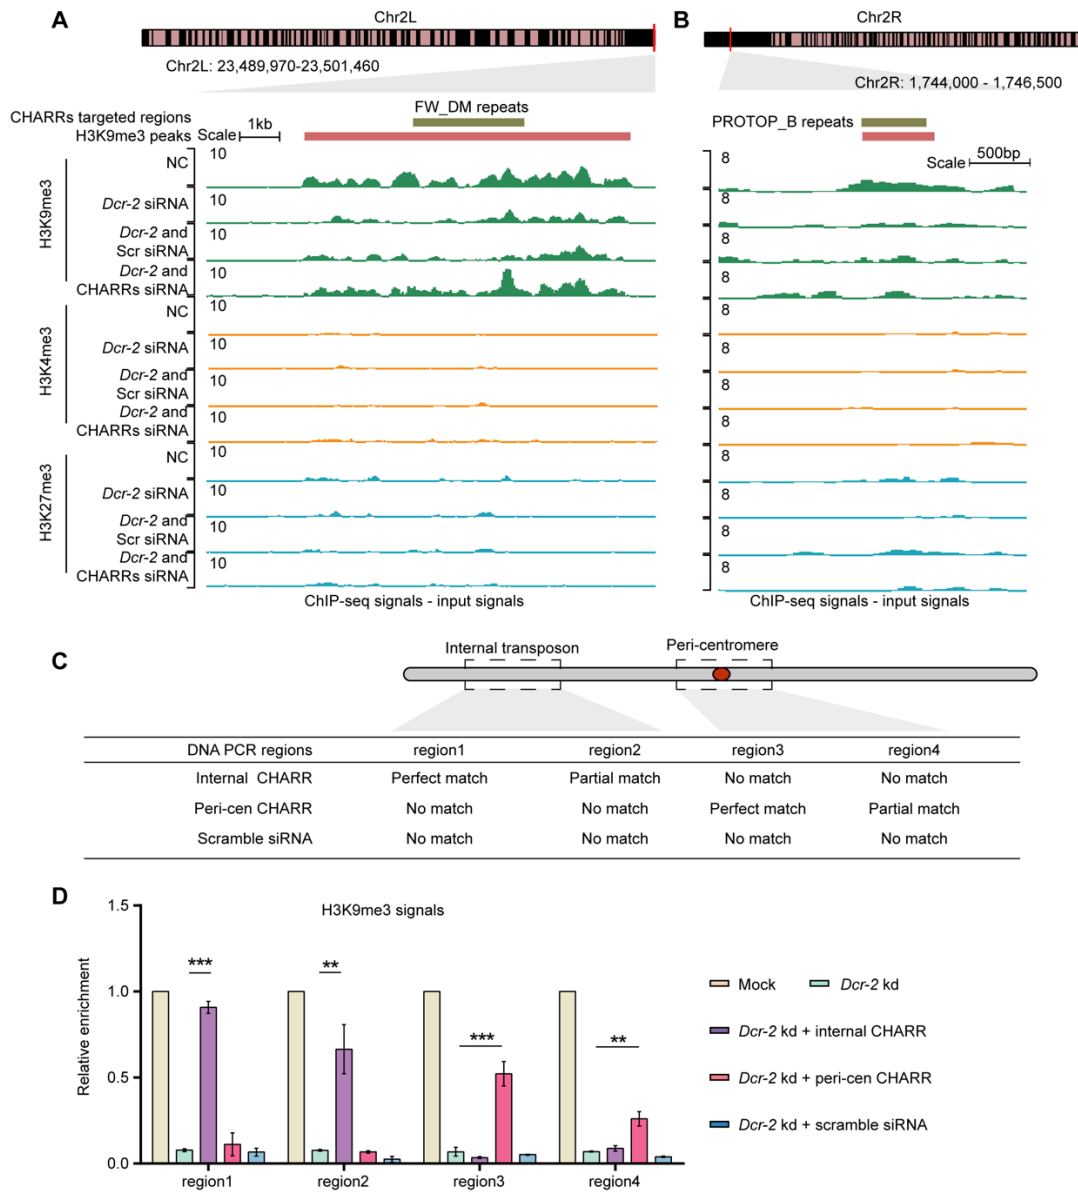

### Supplemental Fig S10. CHARRs-derived siRNAs specifically rescued their target regions

(A and B) A representative a CHARR-targeted (A) or non-CHARR-targeted (B) genomic locus, showing reduced H3K9me3 ChIP-seq signals in response to *Dcr-2* knockdown, complemented with scrambled or CHARRs-derived siRNAs. Signals for H3K4me3 and H3K27me3 were also displayed for comparison. (C) Selection for two internal and two pericentromeric regions for testing the targeting specificity of specific CHARR mimics. (D) ChIP-qPCR analysis of heterochromatin levels in four different regions, two of which are targeted by the internal CHARR mimics and the other two by the pericentromeric (peri-cen) CHARR. Data are presented as mean  $\pm$  SEM (n = 3 biological replicates). \*\*p<0.01, \*\*\*p<0.001 (Student's *t*-test).

## Supplemental\_Fig\_S11

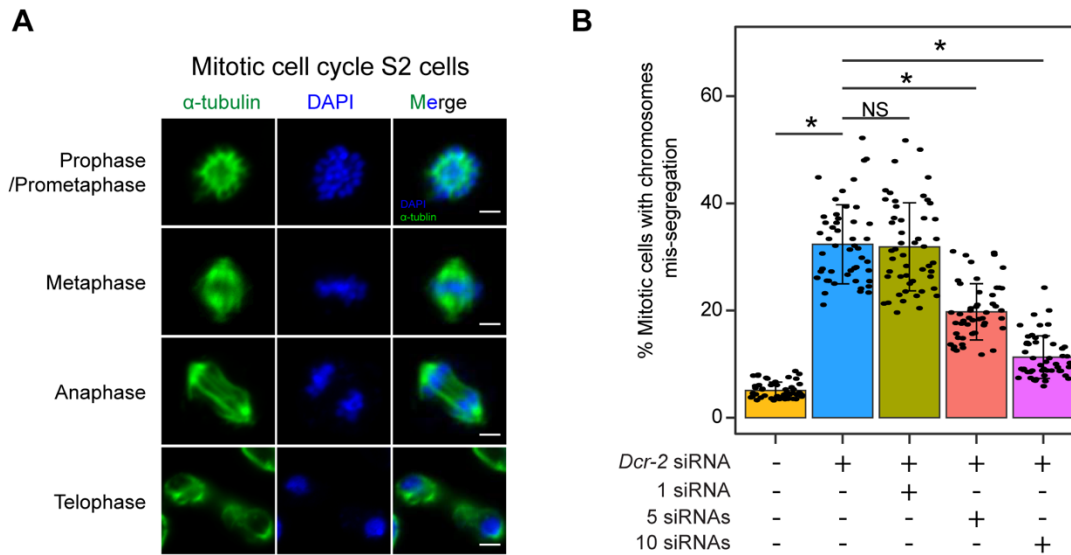

### Supplemental Fig S11. The cell division associated phenotype in S2 cells

(A) Immunostaining of  $\alpha$ -tubulin (green) and DAPI-stained DNA (blue) in *Drosophila* S2 cells during cell cycle. Bar, 2 $\mu$ m. (B) Percentages of S2 cells at metaphase exhibiting mis-segregation at different experimental conditions. n=50 for each condition. \*p<0.05, NS: not significant (multiple group Student's *t*-test).

# Supplemental\_Fig\_S12

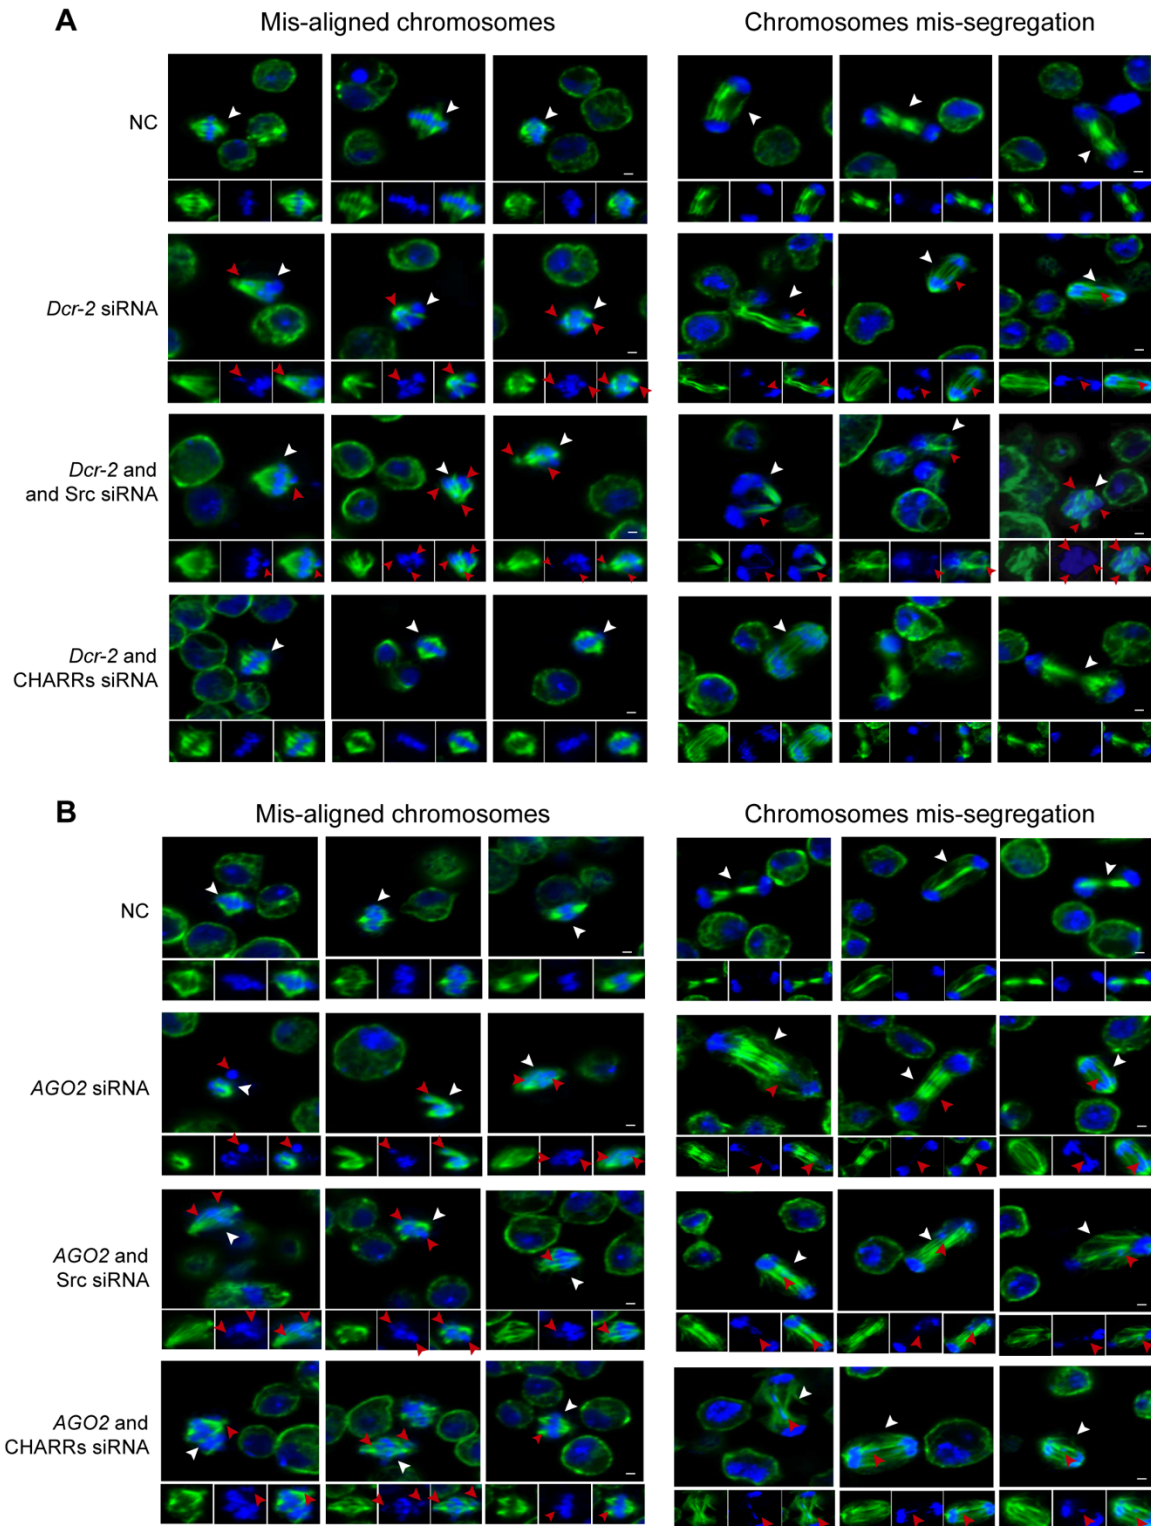

**Supplemental Fig S12. CHARRs could rescue *Dcr-2* knockdown, but not *AGO2* knockdown-induced cell division defects**

(A) Examples of typical chromosomes mis-alignment (left) or mis-segregation(right) phenotype in response to *Dcr-2* knockdown and after treatment with scrambled or CHARRs-derived siRNAs. Green:  $\alpha$ -tubulin; Blue: DAPI-stained DNA. White arrows indicate abnormal cells; Red arrows indicate abnormal loci in specific cells. Scale bars: 2  $\mu$ m. (B) Similar analysis as in A, except in *AGO2* knockdown cells.

**Supplemental Table S1. Statistics of GRID-seq and ChAR-seq data**

| Library Name  | Useful Reads Number | Unique RNA-DNA pairs | Multiple RNA-unique DNA pairs | Unique RNA -multiple DNA pairs | Multiple RNA-DNA pairs |
|---------------|---------------------|----------------------|-------------------------------|--------------------------------|------------------------|
| GRID-seq rep1 | 95.7M               | 20.9M                | 32.1M                         | 5.9M                           | 10.3M                  |
| GRID-seq rep2 | 74.0M               | 5.8M                 | 8.9M                          | 1.3M                           | 2.7M                   |
| ChAR-seq rep1 | 6.7M                | 1.8M                 | 1.4M                          | 0.4M                           | 0.3M                   |
| ChAR-seq rep2 | 14.8M               | 4.5M                 | 4.1M                          | 0.9M                           | 0.8M                   |
| ChAR-seq rep3 | 7.2M                | 0M                   | 0M                            | 0M                             | 3.5M                   |
| ChAR-seq rep4 | 2.5M                | 0.6M                 | 0.6M                          | 0.1M                           | 0.1M                   |
| ChAR-seq rep5 | 186.7M              | 58.8M                | 54.8M                         | 13.9M                          | 12.1M                  |

## Supplemental Table S2. Sequencing datasets used in this study

| Data type                                                                          | Cell type                        | Accession ID |
|------------------------------------------------------------------------------------|----------------------------------|--------------|
| GRO-seq                                                                            | <i>Drosophila</i> S2             | GSM577244    |
| H3K4me3 ChIP-seq                                                                   | <i>Drosophila</i> Embryos 20-24h | GSM400672    |
| H3K9me3 ChIP-seq                                                                   | <i>Drosophila</i> Embryos 20-24h | GSM439452    |
| H3K27me3 ChIP-seq                                                                  | <i>Drosophila</i> Embryos 20-24h | GSM439443    |
| H3K27ac ChIP-seq                                                                   | <i>Drosophila</i> Embryos 20-24h | GSM401423    |
| Input_ChIP-seq<br>(H3K4me3, H3K9me3,<br>H3K27me3, H3K27ac)                         | <i>Drosophila</i> Embryos 20-24h | GSM400673    |
| Pol II5S ChIP-Seq                                                                  | <i>Drosophila</i> S2             | GSM577243    |
| Su(var)205 ChIP-seq                                                                | <i>Drosophila</i> S2             | GSM628252    |
| Su(var)205 input ChIP-seq                                                          | <i>Drosophila</i> S2             | GSM628253    |
| Hi-C                                                                               | <i>Drosophila</i> S2             | GSM1420136   |
| AGO2 IP small RNA-seq rep1                                                         | <i>Drosophila</i> S2             | GSM280087    |
| AGO2 IP small RNA-seq rep2                                                         | <i>Drosophila</i> S2             | GSM266765    |
| AGO1 IP small RNA-seq                                                              | <i>Drosophila</i> S2             | GSM280088    |
| Small RNA-seq in S2 cells                                                          | <i>Drosophila</i> S2             | GSM272652    |
| small RNA-seq in the control<br>flies                                              | Female fly heads                 | GSM2241581   |
| small RNA-seq in the <i>Dcr-2</i> [null]<br>flies                                  | Female fly heads                 | GSM2241582   |
| small RNA-seq in the <i>Dcr-2</i> [null]<br>rescued by the transgenic <i>Dcr-2</i> | Female fly heads                 | GSM2241583   |
| ChAR-seq rep1                                                                      | CME-W1-cl8+ wing-disc cell line  | GSM2552075   |
| ChAR-seq rep2                                                                      | CME-W1-cl8+ wing-disc cell line  | GSM2552076   |
| ChAR-seq rep3                                                                      | CME-W1-cl8+ wing-disc cell line  | GSM2552077   |
| ChAR-seq rep4                                                                      | CME-W1-cl8+ wing-disc cell line  | GSM2552078   |
| ChAR-seq rep5                                                                      | CME-W1-cl8+ wing-disc cell line  | GSM2552079   |

**Supplemental Table S3. List of primer sequences and siRNAs used in this study**

| <b>Primer /siRNAs</b>                                     | <b>Sequence (5' to 3')</b>                         | <b>Assay</b>              |
|-----------------------------------------------------------|----------------------------------------------------|---------------------------|
| <b><i>Dcr-2</i> Primer<br/>(forward)</b>                  | TACGCCTGAGCTGCGAAACG                               | qRT-PCR                   |
| <b><i>Dcr-2</i> Primer<br/>(reverse)</b>                  | GTCCCGAAACTGCTGAATGG                               | qRT-PCR                   |
| <b><i>AGO2</i> Primer<br/>(forward)</b>                   | TTCACCCTGCCACAACAA                                 | qRT-PCR                   |
| <b><i>AGO2</i> Primer<br/>(reverse)</b>                   | CCTCGTATCCATCATCCAGTTC                             | qRT-PCR                   |
| <b><i>Gapdh</i> Primer<br/>(forward)</b>                  | ACCTATGACGAAATCAAGGCTAA                            | qRT-PCR                   |
| <b><i>Gapdh</i> Primer<br/>(reverse)</b>                  | GCTGAAGAAGTCGGTGGAGA                               | qRT-PCR                   |
| <b>dsRNA<sup>a</sup> <i>GFP</i> siRNA<br/>(forward)</b>   | TAATACGACTCACTATAGGGATGGTGAGC<br>AAGGGCGAG         | <i>GFP</i><br>knockdown   |
| <b>dsRNA<sup>a</sup> <i>GFP</i> siRNA<br/>(reverse)</b>   | TAATACGACTCACTATAGGGTACTTGTA<br>CAGCTCGTCCATGCC    | <i>GFP</i><br>knockdown   |
| <b>dsRNA<sup>a</sup> <i>Dcr-2</i> siRNA<br/>(forward)</b> | TAATACGACTCACTATAGGGAGAATCGGC<br>TATCACCTTGTGG     | <i>Dcr-2</i><br>knockdown |
| <b>dsRNA<sup>a</sup> <i>Dcr-2</i> siRNA<br/>(reverse)</b> | TAATACGACTCACTATAGGGAGAATTCCC<br>AAAACGCTCAACAC    | <i>Dcr-2</i><br>knockdown |
| <b>dsRNA<sup>a</sup> <i>AGO2</i> siRNA<br/>(forward)</b>  | TAATACGACTCACTATAGGGTTATATGAA<br>TGACCGAATTTTCGAC  | <i>AGO2</i><br>knockdown  |
| <b>dsRNA<sup>a</sup> <i>AGO2</i> siRNA<br/>(reverse)</b>  | TAATACGACTCACTATAGGGGTTTAGGGC<br>CTGACCTTCCCTCGATG | <i>AGO2</i><br>knockdown  |
| <b>DMCR1A<sup>b</sup></b>                                 | CUAACCGUAGAACUAUGCUUG                              | CHARRs<br>mix             |
| <b>FB4_DM<sup>b</sup><br/>(rep1)</b>                      | UUUAAGAGUGGGCAAACGAAA                              | CHARRs<br>mix             |



|                                                         |                                                   |               |
|---------------------------------------------------------|---------------------------------------------------|---------------|
| <b>FB4_DM<sup>b</sup></b><br><b>(rep2)</b>              | CGUUUGCCCACUCUAAAACU                              | CHARRs<br>mix |
| <b><i>gypsy4_I-int<sup>b</sup></i></b><br><b>(rep1)</b> | AUGAAUUCUGUAGACUCCCUU                             | CHARRs<br>mix |
| <b><i>gypsy4_I-int<sup>b</sup></i></b><br><b>(rep2)</b> | AUAGGAACCCAAAUGCGAAG                              | CHARRs<br>mix |
| <b>FW_DM<sup>b</sup></b><br><b>(rep1)</b>               | CUUGUUGAACAGCAUACCACU                             | CHARRs<br>mix |
| <b>FW_DM<sup>b</sup></b><br><b>(rep2)</b>               | UUACACUAGCGGCCGUAUACU                             | CHARRs<br>mix |
| <b>DOC<sup>b</sup></b>                                  | UAAAUAUCAAGCUGUUGC                                | CHARRs<br>mix |
| <b><i>gypsy2-I_DM<sup>b</sup></i></b>                   | AAAAUACGAAUUUCGCAGACU                             | CHARRs<br>mix |
| <b>I_DM<sup>b</sup></b>                                 | UUGCCCAGGCCUCUGAUGAUU                             | CHARRs<br>mix |
| <b>DOC</b>                                              | TAATACGACTCACTATAGGGAGAATAAAA<br>TAATCAAGCTGTTGC  | Northern blot |
| <b>DMCR1A</b>                                           | TAATACGACTCACTATAGGGAGAACTAAC<br>CGTAGAACTATGCTTG | Northern blot |
| <b><i>gypsy4_I-int</i></b>                              | TAATACGACTCACTATAGGGCTTCGCATT<br>TGGGTTCTAT       | Northern blot |
| <b><i>gypsy2-I_DM</i></b>                               | TAATACGACTCACTATAGGGAGTCTGCGA<br>AATTCGTATTTT     | Northern blot |
| <b>Region1 Primer</b><br><b>(forward)</b>               | CGGCTCAAAGCGAATGT                                 | ChIP-qPCR     |
| <b>Region1 Primer</b><br><b>(reverse)</b>               | GCGACAAGCAACGTGAGTAT                              | ChIP-qPCR     |
| <b>Region2 Primer</b><br><b>(forward)</b>               | ACCCATTAGTCTGCCATCATTAG                           | ChIP-qPCR     |
| <b>Region2 Primer</b><br><b>(reverse)</b>               | GCTAGGCCTTTCGTGATTT                               | ChIP-qPCR     |
| <b>Region3 Primer</b><br><b>(forward)</b>               | CATTTTAAACGTTTGCCACCCTTT                          | ChIP-qPCR     |

|                                     |                              |                                     |
|-------------------------------------|------------------------------|-------------------------------------|
| <b>Region3 Primer<br/>(reverse)</b> | TTTAGTTTTAAAAGGTGGGCAATCG    | ChIP-qPCR                           |
| <b>Region4 Primer<br/>(forward)</b> | CAGCATAACATACAAACATGAGTAACTG | ChIP-qPCR                           |
| <b>Region4 Primer<br/>(reverse)</b> | GCCCACAAATTGCCACACT          | ChIP-qPCR                           |
| <b>Internal CHARR<sup>b</sup></b>   | UAACGAAAUAGAUUCCCUUAC        | ChIP-qPCR                           |
| <b>Peri-cen CHARR<sup>b</sup></b>   | CGUUUGCCCACUCUUAAAACU        | ChIP-qPCR                           |
| <b>Scramble siRNA<sup>b</sup></b>   | UUGUACUACACAAAAGUACUG        | ChIP-<br>qPCR/rescue<br>experiments |

<sup>a</sup>Double strand RNAs

<sup>b</sup>endo-siRNA mimics

**Supplemental Table S4. List of plasmids, antibodies and assay kits used in this study.**

| <b>Plasmids/Antibodies /Assay kits</b>                  | <b>Source</b>            | <b>Identifier</b>             |
|---------------------------------------------------------|--------------------------|-------------------------------|
| pEGFP-N1                                                | Addgene                  | 6085-1                        |
| Rabbit monoclonal anti-Dcr-2                            | Abcam                    | Cat#ab4732; RRID: AB_449344   |
| Rabbit monoclonal anti-H3K9me3                          | Abcam                    | Cat#ab8898; RRID: AB_306848   |
| Rabbit monoclonal anti-H3K27me3                         | Millipore                | Cat#07-449; RRID: AB_310624   |
| Rabbit monoclonal anti-H3K4me3                          | Millipore                | Cat#04-614; RRID: AB_1587134  |
| Mouse monoclonal anti-Tubulin                           | Abcam                    | Cat#ab44928; RRID: AB_2241150 |
| T7 RNA polymerase                                       | Promega                  | P2075                         |
| ULYSIS Nucleic Acid Labeling Kit                        | Thermo Fisher Scientific | U21654                        |
| Biotin RNA labeling mix                                 | Roche                    | 11685597910                   |
| Chemiluminescent Nucleic Acid Detection Module          | Thermo Fisher            | 89880                         |
| NucleoSpin RNA Clean-up XS                              | MN                       | 740903.50                     |
| NorthernMax kit                                         | Thermo Fisher            | AM1940                        |
| Formaldehyde                                            | Sigma-Aldrich            | 252549-100ML                  |
| Protein A/G Magnetic Beads                              | Thermo Fisher            | 88803                         |
| Protease Inhibitor                                      | MCE                      | HY-K0010                      |
| Proteinase K                                            | Ambion                   | 25530015                      |
| Phenol:chloroform:Isoamyl                               | Sigma                    | P2069                         |
| TransScript II Green One-Step qRT-PCR SuperMix          | Transgene                | AQ311-02                      |
| DAPI                                                    | Thermo Fisher            | R37605                        |
| Goat anti-Mouse IgG Secondary Antibody, Alexa Fluor 488 | Invitrogen               | A-11029                       |
